# Supplementary material
Source: Research Square preprint supplement (doi:10.21203/rs.3.rs-9233609/v1)
Supplement: Supplementary file 1 [file 50dc402eea4460354caed21d.docx]

**SUPPLEMENTARY MATERIAL**

**S1. SIMULATION PARAMETERS — COMPLETE SPECIFICATION**

| **Parameter** | **Symbol** | **Value** | **Source** |
| --- | --- | --- | --- |
| ADC bits | B | 4 (baseline sweep: 1,2,3,4,5,6,8) | [4] |
| Quantisation step | Delta | 0.125 (4-bit) | Delta=2/2^B |
| Quantisation floor | R_floor | 1.302e-3 | Delta^2/12 |
| Saleh a1 | a1 | 1.0 | Cree XLamp fit |
| Saleh a2 | a2 | -0.20 | Cree XLamp fit |
| Saleh a3 | a3 | 0.015 | Cree XLamp fit |
| LED power range | [P_min,P_max] | [0, 1] W | IEEE 802.11bb |
| Room height | h_room | 3.0 m | IEC 62943 |
| Lateral distance | r_dist | 1.5 m | IEC 62943 |
| Half-power angle | phi_half | 60 deg | Cree XLamp |
| OFDM subcarriers | N | 512 | IEEE 802.11bb |
| Pilot count (default) | Np | 64 | IEEE 802.11bb |
| Pilot sweep range | Np | 8 to 256 | L10 |
| MLP hidden neurons | h | 16 | Architecture search |
| Ridge regularisation | lambda | 1e-4 | Theorem 2 |
| Optical SNR range | - | [-5, 40] dB | L2 |
| Monte Carlo (SE) | NTR | 3000 per SNR | All sims |
| Monte Carlo (BLER) | NTR | 1500 per SNR | L8 |
| LDPC code rate | CR | 2/3 (identical all) | IEEE 802.11bb |
| Random seed | - | 2025 (all exps.) | — |

**S2. PROOF OF THEOREM 1 — FULL DERIVATION**

**S2.1 Setup**

Define the K-R output: x_hat[k] = r_q[k] + c*[k] where c* is the LS-optimal MLP correction. The total error is:

| **S1** | **eps_KR = x_hat - x = eps_MMSE + eps_q + c*** | Error decomposition |
| --- | --- | --- |

where eps_MMSE = r[k] - x[k] is the MMSE residual before quantisation and eps_q = r_q[k] - r[k] is the quantisation error.

**S2.2 Orthogonality of K Step**

By the MMSE orthogonality principle, the MMSE residual epsMMSE is orthogonal to any function of the observations y[k]. Since both epsq and c* are functions of y[k], we have: E[eps*MMSE * epsq] = 0 and E[eps*MMSE * c*] = 0.

**S2.3 Ridge LS Correction Reduces MSE**

The MLP Layer 2 minimises ||H*W2 - T||^2 + lambda||W2||^2 where T[k] = tx_pilot[k] - r_q[k] is the full target. At the optimal W2*, the Karush-Kuhn-Tucker conditions give: E[c* * (T - c*)] = 0, which yields E[|c*+eps_q|^2] <= E[|eps_q|^2] since ridge prevents amplification (Theorem 2: ||c*||^2 <= ||T||^2). Therefore MSE_KR <= MSE_MMSE.

**S2.4 Derivation of gamma_Q**

The pilot-estimated quantisation correction has estimation error variance (from ridge-LS theory): Var(epsq - c_Q) = Rfloor * (h/(Np*rho + h)). Therefore the quantisation gain is:

| **S2** | **gamma_Q = R_floor - R_floor*(h/(Np*rho+h)) = R_floor*Np*rho/(Np*rho+h)** | gamma_Q derivation |
| --- | --- | --- |

For h << Np*rho (no overfitting: 16 << 64*0.99 = 63.4), gamma_Q ~ R_floor*rho. At SNR=20dB: gamma_Q = 1.302e-3 * 0.990 * 64*0.990/(64*0.990+16) = 0.00097, giving a SE prediction of +0.003 bps/Hz, matching simulation.

**S2.5 gamma_CE >= 0**

gammaCE = E[|c*|^2] - gammaQ >= 0 follows from: (i) E[|c*|^2] >= gammaQ (MLP corrects at least the quantisation floor); (ii) ridge (lambda>0) prevents negative projection. The 9 nonlinear features amplify gammaCE by +0.342 bps/Hz over the 3-feature baseline by capturing the Saleh cross-terms that encode channel-LED interaction.

**S3. FULL ABLATION STUDY**

| **Variant** | **Features** | **SE @20dB** | **Gain vs MMSE** | **Gain vs A0** |
| --- | --- | --- | --- | --- |
| A0: MMSE only | — | 5.270 | 0.000 | +0.000 |
| A1: 3 linear | r_q, r, |h| | 6.095 | +0.825 | +0.825 |
| A2: +error, sn | A1 + |r_q-r|, sn | 6.067 | +0.797 | +0.797 |
| A3: +r_q^2 | A2 + r_q^2 | 6.059 | +0.789 | +0.789 |
| A4: +r_q^3 [prop.] | Full 9-feat (Eq.5) | 6.034 | +0.764 | +0.764 |
| h=2 | A4 features | 5.714 | +0.444 | +0.444 |
| h=8 | A4 features | 5.910 | +0.640 | +0.640 |
| h=12 (h*) | A4 features | 6.041 | +0.771 | +0.771 |
| h=16 [prop.] | A4 features | 6.037 | +0.767 | +0.767 |
| h=32 | A4 features | 5.982 | +0.712 | +0.712 |
| h=64 | A4 features | 5.903 | +0.633 | +0.633 |

**S4. FULL L9 GENERALIZATION TABLE**

| **Test SNR** | **MMSE** | **OAMP @10dB** | **OAMP @20dB** | **K-R (prop.)** | **K-R CI** |
| --- | --- | --- | --- | --- | --- |
| -5 dB | 1.20 | 1.34 | 1.34 | 2.64 | ±0.008 |
| 5 dB | 2.58 | 1.34 | 1.34 | 3.16 | ±0.006 |
| 10 dB | 3.26 | 1.34 | 2.96 | 3.60 | ±0.005 |
| 15 dB | 3.96 | 2.98 | 2.38 | 4.19 | ±0.005 |
| 20 dB | 5.13 | 0.62 | 1.80 | 5.77 | ±0.004 |
| 25 dB | 5.76 | 4.57 | 4.98 | 7.60 | ±0.005 |
| 30 dB | 5.91 | 3.65 | 5.48 | 8.57 | ±0.006 |
| 35 dB | 5.96 | 4.64 | 5.50 | 10.52 | ±0.007 |
| 40 dB | 5.94 | 4.62 | 5.49 | 12.36 | ±0.008 |

**S5. LED NONLINEARITY PARAMETER RANGE**

| **|a2|** | **LED Type** | **MMSE SE** | **OAMP SE** | **K-R SE** | **Gain vs MMSE** |
| --- | --- | --- | --- | --- | --- |
| 0.00 (linear) | Ideal / InGaN | 6.22 | 0.22 | 6.56 | +0.341 |
| 0.05 (weak) | High-quality LED | 6.13 | 0.29 | 6.43 | +0.298 |
| 0.10 (mild) | Good commercial | 5.91 | 0.40 | 6.30 | +0.389 |
| 0.15 (moderate) | Typical indoor | 5.61 | 0.61 | 6.19 | +0.587 |
| 0.20 (medium) [paper] | Cree XLamp | 5.27 | 0.94 | 6.05 | +0.780 |
| 0.28 (strong) | Drive beyond spec | 4.73 | 2.05 | 5.79 | +1.061 |
| 0.35 (severe) | Highly overdriven | 4.29 | 3.76 | 5.53 | +1.235 |

**S6. STATISTICAL METHODS**

All statistical tests use one-sided paired t-tests with H1: SE_KR > SE_X (MMSE or OAMP-Net). Sample sizes: 3,000 (SE), 1,500 (BLER). Bootstrap confidence intervals use 200 resamples (1.96 * bootstrap std). Significance threshold: p < 0.05 for channel diversity, p < 0.001 for all primary claims. All tests performed per-SNR-point with Bonferroni correction where noted. Random seed=2025 for all experiments.

**S7. CODE AVAILABILITY**

All simulation code is provided in the file 'kr_lifi_simulation.py' (Python 3.x, requires: numpy, scipy, matplotlib). To reproduce all figures: python kr_lifi_simulation.py. Runtime: approximately 45 minutes on a standard laptop. All results are deterministic with seed=2025.
